# Supplementary material
Source: bioRxiv or medRxiv preprint supplement (https://medrxiv.org/highwire/filestream/80212/field_highwire_adjunct_files/0/2020.05.07.20083386-1.pdf)

## SUPPLEMENTAL MATERIAL

**Supplemental Table 1.** International Classification of Diseases, Tenth Revision, Clinical Modification (ICD-10-CM), ICD-10 Procedure Coding System (ICD-10-PCS), and diagnosis-related group (DRG) codes used for identification of study outcomes.

| Identifier | Outcome                                                                     | Primary Code                                                                                                                                                                                                                                                                                                                                                                                                                                   | Secondary Code             |
|------------|-----------------------------------------------------------------------------|------------------------------------------------------------------------------------------------------------------------------------------------------------------------------------------------------------------------------------------------------------------------------------------------------------------------------------------------------------------------------------------------------------------------------------------------|----------------------------|
| ICD-10-CM  | Ischemic stroke <sup>1</sup>                                                | I63.x, I64.x, H34.1, G45.x                                                                                                                                                                                                                                                                                                                                                                                                                     |                            |
|            | Hemorrhagic stroke <sup>1</sup>                                             | I61.x, I60.x                                                                                                                                                                                                                                                                                                                                                                                                                                   |                            |
|            | Acute coronary syndrome <sup>2</sup>                                        | I20.0, I21.x, I24.x                                                                                                                                                                                                                                                                                                                                                                                                                            |                            |
| ICD-10-PCS | Mechanical thrombectomy for acute ischemic stroke <sup>3</sup>              | 03CG3Z7, 03CG3ZZ, 03CG4ZZ, 03CK3Z7, 03CK3ZZ, 03CL3Z7, 03CL3ZZ, 03CM3Z7, 03CM3ZZ, 03CN3Z7, 03CN3ZZ                                                                                                                                                                                                                                                                                                                                              | I63.x, I64.x, H34.1, G45.x |
|            | Percutaneous coronary intervention for acute coronary syndrome <sup>4</sup> | 02733D6, 02733DZ, 02733Z6, 02733ZZ, 0273446, 027344Z, 02734D6, 02734DZ, 02734Z6, 02734ZZ, 0272346, 027234Z, 02723D6, 02723DZ, 02723Z6, 02723ZZ, 0272446, 027244Z, 02724D6, 02724DZ, 02724Z6, 02724ZZ, 0273346, 027334Z, 02704Z6, 02704ZZ, 0271346, 027134Z, 02713D6, 02713DZ, 02713Z6, 02713ZZ, 0271446, 027144Z, 02714D6, 02714DZ, 02714Z6, 02714ZZ, 0270346, 027034Z, 02703D6, 02703DZ, 02703Z6, 02703ZZ, 0270446, 027044Z, 02704D6, 02704DZ | I20.0, I21.x, I24.x        |
| DRG        | Acute ischemic stroke with use of thrombolytic <sup>5</sup>                 | 061, 062, 063                                                                                                                                                                                                                                                                                                                                                                                                                                  |                            |

1. Chang TE, Tong X, George MG, et al. Trends and Factors Associated With Concordance Between International Classification of Diseases, Ninth and Tenth Revision, Clinical Modification Codes and Stroke Clinical Diagnoses. *Stroke*. 2019;50(8):1959-1967.

2. Bezin J, Girodet P-O, Rambelomanana S, et al. Choice of ICD-10 codes for the identification of acute coronary syndrome in the French hospitalization database. *Fundam Clin Pharmacol*. 2015;29(6):586-591. doi:10.1111/fcp.12143

3. Mechanical Embolectomy for Treatment of Acute Stroke.

[https://www.unicare.com/dam/medpolicies/unicare/active/policies/mp\\_pw\\_a053520.html](https://www.unicare.com/dam/medpolicies/unicare/active/policies/mp_pw_a053520.html).

4. AHRQ Inpatient Quality Indicators. Percutaneous Coronary Intervention (PCI) Volume.

<https://www.qualityindicators.ahrq.gov/Downloads/Modules/IQI/V50->

[ICD10/TechSpecs/IQI%2006%20Percutaneous%20Coronary%20Intervention%20\(PCI\)%20Volume.pdf](https://www.qualityindicators.ahrq.gov/Downloads/Modules/IQI/V50-ICD10/TechSpecs/IQI%2006%20Percutaneous%20Coronary%20Intervention%20(PCI)%20Volume.pdf).

5. MS-DRG Classifications and Software | CMS. <https://www.cms.gov/Medicare/Medicare-Fee-for-Service-Payment/AcuteInpatientPPS/MS-DRG-Classifications-and-Software>.

**Supplemental Figure 1.** Within year percentage change in the counts of our outcomes between February and March, shown by United States Census region. A) acute ischemic stroke (AIS), B) hemorrhagic stroke, C) mechanical thrombectomy for AIS (MT), D) tissue plasminogen activator for AIS (tPA), E) acute coronary syndrome (ACS), and F) percutaneous coronary intervention (PCI) for ACS.

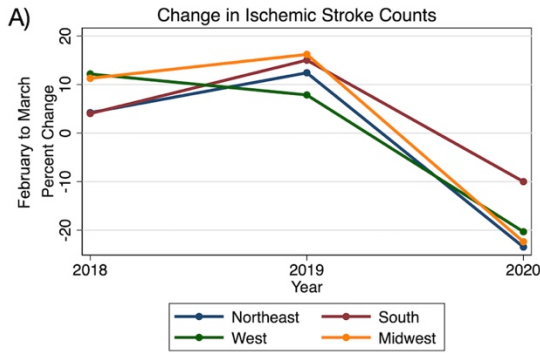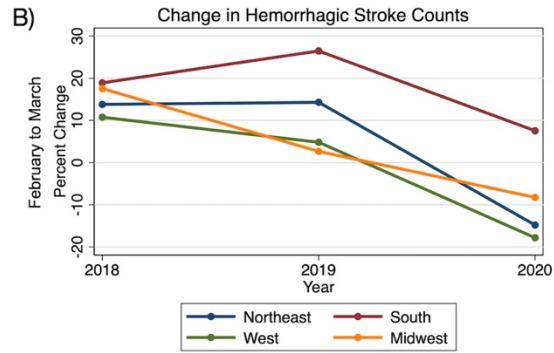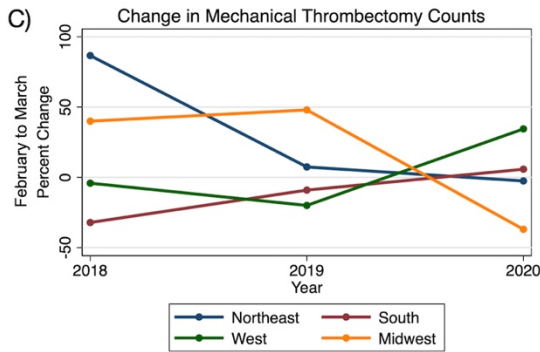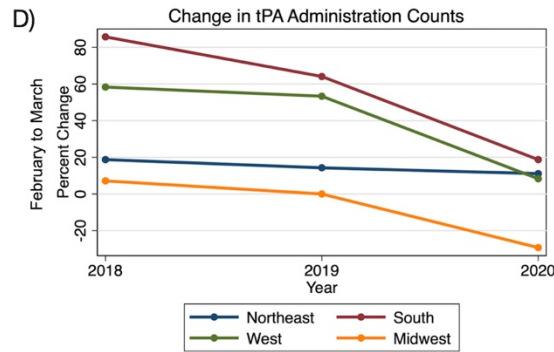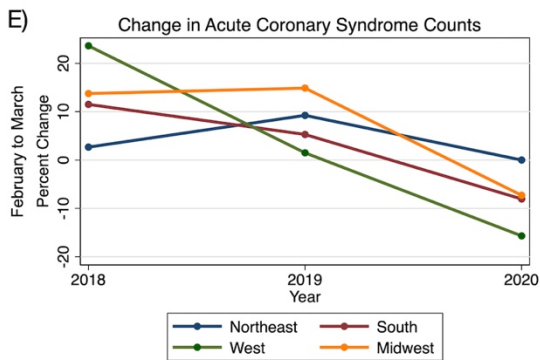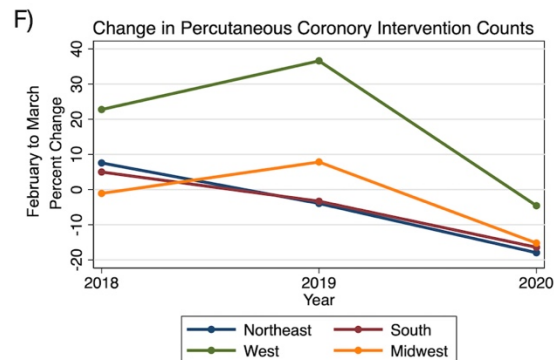

Supplement: Supplementary file [file 2020.05.07.20083386-1.pdf]
